# Supplementary material for: EPSPS Gene Copy Number and Whole-Plant Glyphosate Resistance Level in Kochia scoparia
Source: PLoS One. 2016 Dec 16;11(12):e0168295. doi: 10.1371/journal.pone.0168295 (PMC5161467; doi:10.1371/journal.pone.0168295)
Supplement: S3 Data — Column header definitions: population, code given to each K. scoparia accession; fl.ozA, glyphosate rate applied expressed in fluid ounces per acre of formulated product; rate.gha, glyphosate rate applied expressed in grams of acid equivalent per hectare; vis.control, visual evaluation ranging from 0 (no observable injury) to 100 (completely dead); mort.95, binomial survival data (equal to 1 if Injury is less than or equal to 95 and zero if Injury is greater than 95). (CSV) [file pone.0168295.s006.csv]

population	fl.ozA	rate.gha	vis.control	mort.95
MT-S	0	0	0	1
MT-S	0	0	0	1
MT-S	0	0	0	1
MT-S	0	0	0	1
MT-S	0	0	0	1
MT-S	0	0	0	1
MT-S	0	0	0	1
MT-S	0	0	0	1
MT-S	0	0	0	1
MT-S	0	0	0	1
MT-S	2.75	109	NA	NA
MT-S	2.75	109	30	1
MT-S	2.75	109	0	1
MT-S	2.75	109	10	1
MT-S	2.75	109	25	1
MT-S	2.75	109	0	1
MT-S	2.75	109	0	1
MT-S	2.75	109	10	1
MT-S	2.75	109	30	1
MT-S	2.75	109	10	1
MT-S	5.5	218	NA	NA
MT-S	5.5	218	100	0
MT-S	5.5	218	95	0
MT-S	5.5	218	90	1
MT-S	5.5	218	55	1
MT-S	5.5	218	40	1
MT-S	5.5	218	90	1
MT-S	5.5	218	80	1
MT-S	5.5	218	80	1
MT-S	5.5	218	70	1
MT-S	11	435	80	1
MT-S	11	435	100	0
MT-S	11	435	95	0
MT-S	11	435	100	0
MT-S	11	435	80	1
MT-S	11	435	90	1
MT-S	11	435	100	0
MT-S	11	435	100	0
MT-S	11	435	75	1
MT-S	11	435	100	0
MT-S	22	870	100	0
MT-S	22	870	100	0
MT-S	22	870	100	0
MT-S	22	870	100	0
MT-S	22	870	100	0
MT-S	22	870	100	0
MT-S	22	870	100	0
MT-S	22	870	100	0
MT-S	22	870	100	0
MT-S	22	870	100	0
MT-S	44	1740	100	0
MT-S	44	1740	100	0
MT-S	44	1740	100	0
MT-S	44	1740	100	0
MT-S	44	1740	100	0
MT-S	44	1740	100	0
MT-S	44	1740	100	0
MT-S	44	1740	100	0
MT-S	44	1740	100	0
MT-S	44	1740	100	0
MT-S	88	3480	100	0
MT-S	88	3480	100	0
MT-S	88	3480	100	0
MT-S	88	3480	100	0
MT-S	88	3480	100	0
MT-S	88	3480	100	0
MT-S	88	3480	100	0
MT-S	88	3480	100	0
MT-S	88	3480	100	0
MT-S	88	3480	100	0
MT-S	132	5221	100	0
MT-S	132	5221	100	0
MT-S	132	5221	100	0
MT-S	132	5221	100	0
MT-S	132	5221	100	0
MT-S	132	5221	100	0
MT-S	132	5221	100	0
MT-S	132	5221	100	0
MT-S	132	5221	100	0
MT-S	132	5221	100	0
MT-S	176	6961	100	0
MT-S	176	6961	100	0
MT-S	176	6961	100	0
MT-S	176	6961	100	0
MT-S	176	6961	100	0
MT-S	176	6961	100	0
MT-S	176	6961	100	0
MT-S	176	6961	100	0
MT-S	176	6961	100	0
MT-S	176	6961	100	0
MT-S	220	8701	100	0
MT-S	220	8701	100	0
MT-S	220	8701	100	0
MT-S	220	8701	100	0
MT-S	220	8701	100	0
MT-S	220	8701	100	0
MT-S	220	8701	100	0
MT-S	220	8701	100	0
MT-S	220	8701	100	0
MT-S	220	8701	100	0
MT-S	264	10441	100	0
MT-S	264	10441	100	0
MT-S	264	10441	100	0
MT-S	264	10441	100	0
MT-S	264	10441	100	0
MT-S	264	10441	100	0
MT-S	264	10441	100	0
MT-S	264	10441	100	0
MT-S	264	10441	100	0
MT-S	264	10441	100	0
MT-173	0	0	0	1
MT-173	0	0	0	1
MT-173	0	0	0	1
MT-173	0	0	0	1
MT-173	0	0	0	1
MT-173	0	0	0	1
MT-173	0	0	0	1
MT-173	0	0	0	1
MT-173	0	0	0	1
MT-173	0	0	0	1
MT-173	2.75	109	0	1
MT-173	2.75	109	0	1
MT-173	2.75	109	0	1
MT-173	2.75	109	0	1
MT-173	2.75	109	0	1
MT-173	2.75	109	0	1
MT-173	2.75	109	0	1
MT-173	2.75	109	0	1
MT-173	2.75	109	0	1
MT-173	2.75	109	0	1
MT-173	5.5	218	0	1
MT-173	5.5	218	0	1
MT-173	5.5	218	0	1
MT-173	5.5	218	0	1
MT-173	5.5	218	0	1
MT-173	5.5	218	0	1
MT-173	5.5	218	0	1
MT-173	5.5	218	0	1
MT-173	5.5	218	0	1
MT-173	5.5	218	0	1
MT-173	11	435	0	1
MT-173	11	435	0	1
MT-173	11	435	0	1
MT-173	11	435	0	1
MT-173	11	435	0	1
MT-173	11	435	0	1
MT-173	11	435	5	1
MT-173	11	435	0	1
MT-173	11	435	0	1
MT-173	11	435	0	1
MT-173	22	870	0	1
MT-173	22	870	10	1
MT-173	22	870	5	1
MT-173	22	870	10	1
MT-173	22	870	5	1
MT-173	22	870	5	1
MT-173	22	870	15	1
MT-173	22	870	20	1
MT-173	22	870	15	1
MT-173	22	870	0	1
MT-173	44	1740	55	1
MT-173	44	1740	35	1
MT-173	44	1740	35	1
MT-173	44	1740	NA	NA
MT-173	44	1740	NA	NA
MT-173	44	1740	NA	NA
MT-173	44	1740	NA	NA
MT-173	44	1740	NA	NA
MT-173	44	1740	NA	NA
MT-173	44	1740	NA	NA
MT-173	88	3480	100	0
MT-173	88	3480	100	0
MT-173	88	3480	100	0
MT-173	88	3480	100	0
MT-173	88	3480	100	0
MT-173	88	3480	100	0
MT-173	88	3480	100	0
MT-173	88	3480	100	0
MT-173	88	3480	100	0
MT-173	88	3480	100	0
MT-173	132	5221	100	0
MT-173	132	5221	100	0
MT-173	132	5221	100	0
MT-173	132	5221	100	0
MT-173	132	5221	100	0
MT-173	132	5221	100	0
MT-173	132	5221	100	0
MT-173	132	5221	100	0
MT-173	132	5221	100	0
MT-173	132	5221	100	0
MT-173	176	6961	100	0
MT-173	176	6961	100	0
MT-173	176	6961	100	0
MT-173	176	6961	100	0
MT-173	176	6961	100	0
MT-173	176	6961	100	0
MT-173	176	6961	100	0
MT-173	176	6961	100	0
MT-173	176	6961	100	0
MT-173	176	6961	100	0
MT-173	220	8701	100	0
MT-173	220	8701	100	0
MT-173	220	8701	100	0
MT-173	220	8701	100	0
MT-173	220	8701	100	0
MT-173	220	8701	100	0
MT-173	220	8701	100	0
MT-173	220	8701	100	0
MT-173	220	8701	100	0
MT-173	220	8701	100	0
MT-173	264	10441	100	0
MT-173	264	10441	100	0
MT-173	264	10441	100	0
MT-173	264	10441	100	0
MT-173	264	10441	100	0
MT-173	264	10441	100	0
MT-173	264	10441	100	0
MT-173	264	10441	100	0
MT-173	264	10441	100	0
MT-173	264	10441	100	0
MT-102	0	0	0	1
MT-102	0	0	0	1
MT-102	0	0	0	1
MT-102	0	0	0	1
MT-102	0	0	0	1
MT-102	0	0	0	1
MT-102	0	0	0	1
MT-102	0	0	0	1
MT-102	0	0	0	1
MT-102	0	0	0	1
MT-102	2.75	109	0	1
MT-102	2.75	109	5	1
MT-102	2.75	109	0	1
MT-102	2.75	109	0	1
MT-102	2.75	109	10	1
MT-102	2.75	109	0	1
MT-102	2.75	109	5	1
MT-102	2.75	109	0	1
MT-102	2.75	109	0	1
MT-102	2.75	109	0	1
MT-102	5.5	218	0	1
MT-102	5.5	218	0	1
MT-102	5.5	218	0	1
MT-102	5.5	218	10	1
MT-102	5.5	218	0	1
MT-102	5.5	218	10	1
MT-102	5.5	218	10	1
MT-102	5.5	218	0	1
MT-102	5.5	218	0	1
MT-102	5.5	218	0	1
MT-102	11	435	10	1
MT-102	11	435	5	1
MT-102	11	435	5	1
MT-102	11	435	15	1
MT-102	11	435	15	1
MT-102	11	435	5	1
MT-102	11	435	5	1
MT-102	11	435	0	1
MT-102	11	435	5	1
MT-102	11	435	NA	NA
MT-102	22	870	20	1
MT-102	22	870	20	1
MT-102	22	870	20	1
MT-102	22	870	25	1
MT-102	22	870	25	1
MT-102	22	870	15	1
MT-102	22	870	25	1
MT-102	22	870	25	1
MT-102	22	870	25	1
MT-102	22	870	25	1
MT-102	44	1740	20	1
MT-102	44	1740	25	1
MT-102	44	1740	NA	NA
MT-102	44	1740	NA	NA
MT-102	44	1740	60	1
MT-102	44	1740	55	1
MT-102	44	1740	65	1
MT-102	44	1740	85	1
MT-102	44	1740	NA	NA
MT-102	44	1740	NA	NA
MT-102	88	3480	95	0
MT-102	88	3480	100	0
MT-102	88	3480	95	0
MT-102	88	3480	90	1
MT-102	88	3480	85	1
MT-102	88	3480	100	0
MT-102	88	3480	100	0
MT-102	88	3480	100	0
MT-102	88	3480	100	0
MT-102	88	3480	100	0
MT-102	132	5221	100	0
MT-102	132	5221	100	0
MT-102	132	5221	100	0
MT-102	132	5221	100	0
MT-102	132	5221	100	0
MT-102	132	5221	100	0
MT-102	132	5221	100	0
MT-102	132	5221	100	0
MT-102	132	5221	100	0
MT-102	132	5221	100	0
MT-102	176	6961	100	0
MT-102	176	6961	100	0
MT-102	176	6961	100	0
MT-102	176	6961	100	0
MT-102	176	6961	100	0
MT-102	176	6961	100	0
MT-102	176	6961	100	0
MT-102	176	6961	100	0
MT-102	176	6961	100	0
MT-102	176	6961	100	0
MT-102	220	8701	100	0
MT-102	220	8701	100	0
MT-102	220	8701	100	0
MT-102	220	8701	100	0
MT-102	220	8701	100	0
MT-102	220	8701	100	0
MT-102	220	8701	100	0
MT-102	220	8701	100	0
MT-102	220	8701	100	0
MT-102	220	8701	100	0
MT-102	264	10441	100	0
MT-102	264	10441	100	0
MT-102	264	10441	100	0
MT-102	264	10441	100	0
MT-102	264	10441	100	0
MT-102	264	10441	100	0
MT-102	264	10441	100	0
MT-102	264	10441	100	0
MT-102	264	10441	100	0
MT-102	264	10441	100	0
MT-109	0	0	0	1
MT-109	0	0	0	1
MT-109	0	0	0	1
MT-109	0	0	0	1
MT-109	0	0	0	1
MT-109	0	0	0	1
MT-109	0	0	0	1
MT-109	0	0	0	1
MT-109	0	0	0	1
MT-109	0	0	0	1
MT-109	2.75	109	0	1
MT-109	2.75	109	0	1
MT-109	2.75	109	0	1
MT-109	2.75	109	0	1
MT-109	2.75	109	0	1
MT-109	2.75	109	0	1
MT-109	2.75	109	0	1
MT-109	2.75	109	0	1
MT-109	2.75	109	0	1
MT-109	2.75	109	0	1
MT-109	5.5	218	0	1
MT-109	5.5	218	0	1
MT-109	5.5	218	0	1
MT-109	5.5	218	0	1
MT-109	5.5	218	0	1
MT-109	5.5	218	0	1
MT-109	5.5	218	0	1
MT-109	5.5	218	0	1
MT-109	5.5	218	0	1
MT-109	5.5	218	0	1
MT-109	11	435	0	1
MT-109	11	435	0	1
MT-109	11	435	0	1
MT-109	11	435	0	1
MT-109	11	435	15	1
MT-109	11	435	0	1
MT-109	11	435	5	1
MT-109	11	435	5	1
MT-109	11	435	5	1
MT-109	11	435	NA	NA
MT-109	22	870	65	1
MT-109	22	870	60	1
MT-109	22	870	60	1
MT-109	22	870	40	1
MT-109	22	870	40	1
MT-109	22	870	50	1
MT-109	22	870	50	1
MT-109	22	870	55	1
MT-109	22	870	NA	NA
MT-109	22	870	NA	NA
MT-109	44	1740	90	1
MT-109	44	1740	90	1
MT-109	44	1740	75	1
MT-109	44	1740	80	1
MT-109	44	1740	60	1
MT-109	44	1740	95	0
MT-109	44	1740	75	1
MT-109	44	1740	90	1
MT-109	44	1740	NA	NA
MT-109	44	1740	NA	NA
MT-109	88	3480	95	0
MT-109	88	3480	100	0
MT-109	88	3480	100	0
MT-109	88	3480	85	1
MT-109	88	3480	90	1
MT-109	88	3480	100	0
MT-109	88	3480	NA	NA
MT-109	88	3480	NA	NA
MT-109	88	3480	NA	NA
MT-109	88	3480	NA	NA
MT-109	132	5221	100	0
MT-109	132	5221	100	0
MT-109	132	5221	100	0
MT-109	132	5221	100	0
MT-109	132	5221	100	0
MT-109	132	5221	100	0
MT-109	132	5221	100	0
MT-109	132	5221	100	0
MT-109	132	5221	100	0
MT-109	132	5221	100	0
MT-109	176	6961	100	0
MT-109	176	6961	100	0
MT-109	176	6961	100	0
MT-109	176	6961	100	0
MT-109	176	6961	100	0
MT-109	176	6961	100	0
MT-109	176	6961	100	0
MT-109	176	6961	100	0
MT-109	176	6961	100	0
MT-109	176	6961	100	0
MT-109	220	8701	100	0
MT-109	220	8701	100	0
MT-109	220	8701	100	0
MT-109	220	8701	100	0
MT-109	220	8701	100	0
MT-109	220	8701	100	0
MT-109	220	8701	100	0
MT-109	220	8701	100	0
MT-109	220	8701	100	0
MT-109	220	8701	100	0
MT-109	264	10441	100	0
MT-109	264	10441	100	0
MT-109	264	10441	100	0
MT-109	264	10441	100	0
MT-109	264	10441	100	0
MT-109	264	10441	100	0
MT-109	264	10441	100	0
MT-109	264	10441	100	0
MT-109	264	10441	100	0
MT-109	264	10441	100	0
MT-101	0	0	0	1
MT-101	0	0	0	1
MT-101	0	0	0	1
MT-101	0	0	0	1
MT-101	0	0	0	1
MT-101	0	0	0	1
MT-101	0	0	0	1
MT-101	0	0	0	1
MT-101	0	0	0	1
MT-101	0	0	0	1
MT-101	2.75	109	10	1
MT-101	2.75	109	10	1
MT-101	2.75	109	15	1
MT-101	2.75	109	10	1
MT-101	2.75	109	20	1
MT-101	2.75	109	5	1
MT-101	2.75	109	5	1
MT-101	2.75	109	10	1
MT-101	2.75	109	NA	NA
MT-101	2.75	109	NA	NA
MT-101	5.5	218	85	1
MT-101	5.5	218	90	1
MT-101	5.5	218	90	1
MT-101	5.5	218	90	1
MT-101	5.5	218	90	1
MT-101	5.5	218	85	1
MT-101	5.5	218	0	1
MT-101	5.5	218	15	1
MT-101	5.5	218	90	1
MT-101	5.5	218	NA	NA
MT-101	11	435	98	0
MT-101	11	435	100	0
MT-101	11	435	85	1
MT-101	11	435	100	0
MT-101	11	435	100	0
MT-101	11	435	100	0
MT-101	11	435	100	0
MT-101	11	435	20	1
MT-101	11	435	100	0
MT-101	11	435	100	0
MT-101	22	870	100	0
MT-101	22	870	100	0
MT-101	22	870	100	0
MT-101	22	870	100	0
MT-101	22	870	85	1
MT-101	22	870	100	0
MT-101	22	870	100	0
MT-101	22	870	100	0
MT-101	22	870	100	0
MT-101	22	870	100	0
MT-101	44	1740	100	0
MT-101	44	1740	100	0
MT-101	44	1740	100	0
MT-101	44	1740	100	0
MT-101	44	1740	100	0
MT-101	44	1740	100	0
MT-101	44	1740	100	0
MT-101	44	1740	100	0
MT-101	44	1740	100	0
MT-101	44	1740	100	0
MT-101	88	3480	100	0
MT-101	88	3480	100	0
MT-101	88	3480	100	0
MT-101	88	3480	100	0
MT-101	88	3480	100	0
MT-101	88	3480	100	0
MT-101	88	3480	100	0
MT-101	88	3480	100	0
MT-101	88	3480	100	0
MT-101	88	3480	100	0
MT-101	132	5221	100	0
MT-101	132	5221	100	0
MT-101	132	5221	100	0
MT-101	132	5221	100	0
MT-101	132	5221	100	0
MT-101	132	5221	100	0
MT-101	132	5221	100	0
MT-101	132	5221	100	0
MT-101	132	5221	100	0
MT-101	132	5221	100	0
MT-101	176	6961	100	0
MT-101	176	6961	100	0
MT-101	176	6961	100	0
MT-101	176	6961	100	0
MT-101	176	6961	100	0
MT-101	176	6961	100	0
MT-101	176	6961	100	0
MT-101	176	6961	100	0
MT-101	176	6961	100	0
MT-101	176	6961	100	0
MT-101	220	8701	100	0
MT-101	220	8701	100	0
MT-101	220	8701	100	0
MT-101	220	8701	100	0
MT-101	220	8701	100	0
MT-101	220	8701	100	0
MT-101	220	8701	100	0
MT-101	220	8701	100	0
MT-101	220	8701	100	0
MT-101	220	8701	100	0
MT-101	264	10441	100	0
MT-101	264	10441	100	0
MT-101	264	10441	100	0
MT-101	264	10441	100	0
MT-101	264	10441	100	0
MT-101	264	10441	100	0
MT-101	264	10441	100	0
MT-101	264	10441	100	0
MT-101	264	10441	100	0
MT-101	264	10441	100	0
MT-103	0	0	0	1
MT-103	0	0	0	1
MT-103	0	0	0	1
MT-103	0	0	0	1
MT-103	0	0	0	1
MT-103	0	0	0	1
MT-103	0	0	0	1
MT-103	0	0	0	1
MT-103	0	0	0	1
MT-103	0	0	0	1
MT-103	2.75	109	0	1
MT-103	2.75	109	0	1
MT-103	2.75	109	0	1
MT-103	2.75	109	0	1
MT-103	2.75	109	0	1
MT-103	2.75	109	0	1
MT-103	2.75	109	0	1
MT-103	2.75	109	0	1
MT-103	2.75	109	0	1
MT-103	2.75	109	0	1
MT-103	5.5	218	0	1
MT-103	5.5	218	0	1
MT-103	5.5	218	0	1
MT-103	5.5	218	0	1
MT-103	5.5	218	0	1
MT-103	5.5	218	0	1
MT-103	5.5	218	0	1
MT-103	5.5	218	0	1
MT-103	5.5	218	0	1
MT-103	5.5	218	0	1
MT-103	11	435	0	1
MT-103	11	435	0	1
MT-103	11	435	0	1
MT-103	11	435	0	1
MT-103	11	435	0	1
MT-103	11	435	15	1
MT-103	11	435	0	1
MT-103	11	435	0	1
MT-103	11	435	0	1
MT-103	11	435	0	1
MT-103	22	870	0	1
MT-103	22	870	0	1
MT-103	22	870	20	1
MT-103	22	870	0	1
MT-103	22	870	0	1
MT-103	22	870	5	1
MT-103	22	870	5	1
MT-103	22	870	20	1
MT-103	22	870	NA	NA
MT-103	22	870	0	1
MT-103	44	1740	55	1
MT-103	44	1740	100	0
MT-103	44	1740	100	0
MT-103	44	1740	100	0
MT-103	44	1740	100	0
MT-103	44	1740	30	1
MT-103	44	1740	100	0
MT-103	44	1740	100	0
MT-103	44	1740	100	0
MT-103	44	1740	100	0
MT-103	88	3480	100	0
MT-103	88	3480	100	0
MT-103	88	3480	100	0
MT-103	88	3480	100	0
MT-103	88	3480	100	0
MT-103	88	3480	100	0
MT-103	88	3480	100	0
MT-103	88	3480	100	0
MT-103	88	3480	100	0
MT-103	88	3480	100	0
MT-103	132	5221	100	0
MT-103	132	5221	100	0
MT-103	132	5221	100	0
MT-103	132	5221	100	0
MT-103	132	5221	100	0
MT-103	132	5221	100	0
MT-103	132	5221	100	0
MT-103	132	5221	100	0
MT-103	132	5221	100	0
MT-103	132	5221	100	0
MT-103	176	6961	100	0
MT-103	176	6961	100	0
MT-103	176	6961	100	0
MT-103	176	6961	100	0
MT-103	176	6961	100	0
MT-103	176	6961	100	0
MT-103	176	6961	100	0
MT-103	176	6961	100	0
MT-103	176	6961	100	0
MT-103	176	6961	100	0
MT-103	220	8701	100	0
MT-103	220	8701	100	0
MT-103	220	8701	100	0
MT-103	220	8701	100	0
MT-103	220	8701	100	0
MT-103	220	8701	100	0
MT-103	220	8701	100	0
MT-103	220	8701	100	0
MT-103	220	8701	100	0
MT-103	220	8701	100	0
MT-103	264	10441	100	0
MT-103	264	10441	100	0
MT-103	264	10441	100	0
MT-103	264	10441	100	0
MT-103	264	10441	100	0
MT-103	264	10441	100	0
MT-103	264	10441	100	0
MT-103	264	10441	100	0
MT-103	264	10441	100	0
MT-103	264	10441	100	0
MT-137	0	0	0	1
MT-137	0	0	0	1
MT-137	0	0	0	1
MT-137	0	0	0	1
MT-137	0	0	0	1
MT-137	0	0	0	1
MT-137	0	0	NA	NA
MT-137	0	0	0	1
MT-137	0	0	0	1
MT-137	0	0	0	1
MT-137	2.75	109	0	1
MT-137	2.75	109	0	1
MT-137	2.75	109	0	1
MT-137	2.75	109	0	1
MT-137	2.75	109	0	1
MT-137	2.75	109	NA	NA
MT-137	2.75	109	0	1
MT-137	2.75	109	NA	NA
MT-137	2.75	109	0	1
MT-137	2.75	109	0	1
MT-137	5.5	218	0	1
MT-137	5.5	218	0	1
MT-137	5.5	218	NA	NA
MT-137	5.5	218	0	1
MT-137	5.5	218	0	1
MT-137	5.5	218	0	1
MT-137	5.5	218	NA	NA
MT-137	5.5	218	NA	NA
MT-137	5.5	218	0	1
MT-137	5.5	218	NA	NA
MT-137	11	435	0	1
MT-137	11	435	0	1
MT-137	11	435	10	1
MT-137	11	435	10	1
MT-137	11	435	NA	NA
MT-137	11	435	0	1
MT-137	11	435	NA	NA
MT-137	11	435	NA	NA
MT-137	11	435	0	1
MT-137	11	435	0	1
MT-137	22	870	NA	NA
MT-137	22	870	NA	NA
MT-137	22	870	NA	NA
MT-137	22	870	NA	NA
MT-137	22	870	NA	NA
MT-137	22	870	0	1
MT-137	22	870	0	1
MT-137	22	870	20	1
MT-137	22	870	15	1
MT-137	22	870	0	1
MT-137	44	1740	100	0
MT-137	44	1740	100	0
MT-137	44	1740	100	0
MT-137	44	1740	100	0
MT-137	44	1740	NA	NA
MT-137	44	1740	100	0
MT-137	44	1740	100	0
MT-137	44	1740	100	0
MT-137	44	1740	100	0
MT-137	44	1740	100	0
MT-137	88	3480	100	0
MT-137	88	3480	100	0
MT-137	88	3480	100	0
MT-137	88	3480	100	0
MT-137	88	3480	100	0
MT-137	88	3480	100	0
MT-137	88	3480	100	0
MT-137	88	3480	100	0
MT-137	88	3480	100	0
MT-137	88	3480	100	0
MT-137	132	5221	100	0
MT-137	132	5221	100	0
MT-137	132	5221	100	0
MT-137	132	5221	100	0
MT-137	132	5221	100	0
MT-137	132	5221	100	0
MT-137	132	5221	100	0
MT-137	132	5221	100	0
MT-137	132	5221	100	0
MT-137	132	5221	100	0
MT-137	176	6961	100	0
MT-137	176	6961	100	0
MT-137	176	6961	100	0
MT-137	176	6961	100	0
MT-137	176	6961	100	0
MT-137	176	6961	100	0
MT-137	176	6961	100	0
MT-137	176	6961	100	0
MT-137	176	6961	100	0
MT-137	176	6961	100	0
MT-137	220	8701	100	0
MT-137	220	8701	100	0
MT-137	220	8701	100	0
MT-137	220	8701	100	0
MT-137	220	8701	100	0
MT-137	220	8701	100	0
MT-137	220	8701	100	0
MT-137	220	8701	100	0
MT-137	220	8701	100	0
MT-137	220	8701	100	0
MT-137	264	10441	100	0
MT-137	264	10441	100	0
MT-137	264	10441	100	0
MT-137	264	10441	100	0
MT-137	264	10441	100	0
MT-137	264	10441	100	0
MT-137	264	10441	100	0
MT-137	264	10441	100	0
MT-137	264	10441	100	0
MT-137	264	10441	100	0
MT-170	0	0	0	1
MT-170	0	0	0	1
MT-170	0	0	0	1
MT-170	0	0	0	1
MT-170	0	0	0	1
MT-170	0	0	0	1
MT-170	0	0	0	1
MT-170	0	0	0	1
MT-170	0	0	0	1
MT-170	0	0	0	1
MT-170	2.75	109	0	1
MT-170	2.75	109	0	1
MT-170	2.75	109	0	1
MT-170	2.75	109	0	1
MT-170	2.75	109	0	1
MT-170	2.75	109	0	1
MT-170	2.75	109	0	1
MT-170	2.75	109	NA	NA
MT-170	2.75	109	0	1
MT-170	2.75	109	NA	NA
MT-170	5.5	218	0	1
MT-170	5.5	218	0	1
MT-170	5.5	218	0	1
MT-170	5.5	218	0	1
MT-170	5.5	218	0	1
MT-170	5.5	218	0	1
MT-170	5.5	218	NA	NA
MT-170	5.5	218	0	1
MT-170	5.5	218	0	1
MT-170	5.5	218	0	1
MT-170	11	435	5	1
MT-170	11	435	15	1
MT-170	11	435	0	1
MT-170	11	435	0	1
MT-170	11	435	0	1
MT-170	11	435	5	1
MT-170	11	435	NA	NA
MT-170	11	435	5	1
MT-170	11	435	0	1
MT-170	11	435	0	1
MT-170	22	870	45	1
MT-170	22	870	45	1
MT-170	22	870	5	1
MT-170	22	870	0	1
MT-170	22	870	0	1
MT-170	22	870	NA	NA
MT-170	22	870	NA	NA
MT-170	22	870	25	1
MT-170	22	870	5	1
MT-170	22	870	20	1
MT-170	44	1740	100	0
MT-170	44	1740	100	0
MT-170	44	1740	100	0
MT-170	44	1740	100	0
MT-170	44	1740	100	0
MT-170	44	1740	100	0
MT-170	44	1740	100	0
MT-170	44	1740	100	0
MT-170	44	1740	100	0
MT-170	44	1740	100	0
MT-170	88	3480	100	0
MT-170	88	3480	100	0
MT-170	88	3480	100	0
MT-170	88	3480	100	0
MT-170	88	3480	100	0
MT-170	88	3480	100	0
MT-170	88	3480	100	0
MT-170	88	3480	100	0
MT-170	88	3480	100	0
MT-170	88	3480	100	0
MT-170	132	5221	100	0
MT-170	132	5221	100	0
MT-170	132	5221	100	0
MT-170	132	5221	100	0
MT-170	132	5221	100	0
MT-170	132	5221	100	0
MT-170	132	5221	100	0
MT-170	132	5221	100	0
MT-170	132	5221	100	0
MT-170	132	5221	100	0
MT-170	176	6961	100	0
MT-170	176	6961	100	0
MT-170	176	6961	100	0
MT-170	176	6961	100	0
MT-170	176	6961	100	0
MT-170	176	6961	100	0
MT-170	176	6961	100	0
MT-170	176	6961	100	0
MT-170	176	6961	100	0
MT-170	176	6961	100	0
MT-170	220	8701	100	0
MT-170	220	8701	100	0
MT-170	220	8701	100	0
MT-170	220	8701	100	0
MT-170	220	8701	100	0
MT-170	220	8701	100	0
MT-170	220	8701	100	0
MT-170	220	8701	100	0
MT-170	220	8701	100	0
MT-170	220	8701	100	0
MT-170	264	10441	100	0
MT-170	264	10441	100	0
MT-170	264	10441	100	0
MT-170	264	10441	100	0
MT-170	264	10441	100	0
MT-170	264	10441	100	0
MT-170	264	10441	100	0
MT-170	264	10441	100	0
MT-170	264	10441	100	0
MT-170	264	10441	100	0
MT-104	0	0	0	1
MT-104	0	0	0	1
MT-104	0	0	0	1
MT-104	0	0	0	1
MT-104	0	0	0	1
MT-104	0	0	0	1
MT-104	0	0	0	1
MT-104	0	0	0	1
MT-104	0	0	0	1
MT-104	0	0	0	1
MT-104	2.75	109	10	1
MT-104	2.75	109	10	1
MT-104	2.75	109	5	1
MT-104	2.75	109	5	1
MT-104	2.75	109	10	1
MT-104	2.75	109	5	1
MT-104	2.75	109	5	1
MT-104	2.75	109	NA	NA
MT-104	2.75	109	NA	NA
MT-104	2.75	109	NA	NA
MT-104	5.5	218	10	1
MT-104	5.5	218	5	1
MT-104	5.5	218	10	1
MT-104	5.5	218	15	1
MT-104	5.5	218	25	1
MT-104	5.5	218	20	1
MT-104	5.5	218	5	1
MT-104	5.5	218	15	1
MT-104	5.5	218	NA	NA
MT-104	5.5	218	NA	NA
MT-104	11	435	35	1
MT-104	11	435	25	1
MT-104	11	435	25	1
MT-104	11	435	30	1
MT-104	11	435	30	1
MT-104	11	435	40	1
MT-104	11	435	20	1
MT-104	11	435	35	1
MT-104	11	435	NA	NA
MT-104	11	435	NA	NA
MT-104	22	870	40	1
MT-104	22	870	35	1
MT-104	22	870	40	1
MT-104	22	870	40	1
MT-104	22	870	35	1
MT-104	22	870	NA	NA
MT-104	22	870	NA	NA
MT-104	22	870	NA	NA
MT-104	22	870	NA	NA
MT-104	22	870	NA	NA
MT-104	44	1740	90	1
MT-104	44	1740	90	1
MT-104	44	1740	90	1
MT-104	44	1740	90	1
MT-104	44	1740	85	1
MT-104	44	1740	85	1
MT-104	44	1740	90	1
MT-104	44	1740	90	1
MT-104	44	1740	85	1
MT-104	44	1740	NA	NA
MT-104	88	3480	100	0
MT-104	88	3480	100	0
MT-104	88	3480	100	0
MT-104	88	3480	100	0
MT-104	88	3480	100	0
MT-104	88	3480	100	0
MT-104	88	3480	100	0
MT-104	88	3480	100	0
MT-104	88	3480	100	0
MT-104	88	3480	100	0
MT-104	132	5221	100	0
MT-104	132	5221	100	0
MT-104	132	5221	100	0
MT-104	132	5221	100	0
MT-104	132	5221	100	0
MT-104	132	5221	100	0
MT-104	132	5221	100	0
MT-104	132	5221	100	0
MT-104	132	5221	100	0
MT-104	132	5221	100	0
MT-104	176	6961	100	0
MT-104	176	6961	100	0
MT-104	176	6961	100	0
MT-104	176	6961	100	0
MT-104	176	6961	100	0
MT-104	176	6961	100	0
MT-104	176	6961	100	0
MT-104	176	6961	100	0
MT-104	176	6961	100	0
MT-104	176	6961	100	0
MT-104	220	8701	100	0
MT-104	220	8701	100	0
MT-104	220	8701	100	0
MT-104	220	8701	100	0
MT-104	220	8701	100	0
MT-104	220	8701	100	0
MT-104	220	8701	100	0
MT-104	220	8701	100	0
MT-104	220	8701	100	0
MT-104	220	8701	100	0
MT-104	264	10441	100	0
MT-104	264	10441	100	0
MT-104	264	10441	100	0
MT-104	264	10441	100	0
MT-104	264	10441	100	0
MT-104	264	10441	100	0
MT-104	264	10441	100	0
MT-104	264	10441	100	0
MT-104	264	10441	100	0
MT-104	264	10441	100	0
MT-175	0	0	0	1
MT-175	0	0	0	1
MT-175	0	0	0	1
MT-175	0	0	0	1
MT-175	0	0	0	1
MT-175	0	0	0	1
MT-175	0	0	0	1
MT-175	0	0	0	1
MT-175	0	0	0	1
MT-175	0	0	0	1
MT-175	2.75	109	0	1
MT-175	2.75	109	0	1
MT-175	2.75	109	0	1
MT-175	2.75	109	0	1
MT-175	2.75	109	0	1
MT-175	2.75	109	0	1
MT-175	2.75	109	0	1
MT-175	2.75	109	0	1
MT-175	2.75	109	0	1
MT-175	2.75	109	0	1
MT-175	5.5	218	10	1
MT-175	5.5	218	10	1
MT-175	5.5	218	10	1
MT-175	5.5	218	10	1
MT-175	5.5	218	10	1
MT-175	5.5	218	5	1
MT-175	5.5	218	15	1
MT-175	5.5	218	0	1
MT-175	5.5	218	0	1
MT-175	5.5	218	0	1
MT-175	11	435	10	1
MT-175	11	435	10	1
MT-175	11	435	15	1
MT-175	11	435	15	1
MT-175	11	435	10	1
MT-175	11	435	20	1
MT-175	11	435	10	1
MT-175	11	435	20	1
MT-175	11	435	10	1
MT-175	11	435	NA	NA
MT-175	22	870	40	1
MT-175	22	870	15	1
MT-175	22	870	20	1
MT-175	22	870	NA	NA
MT-175	22	870	45	1
MT-175	22	870	NA	NA
MT-175	22	870	NA	NA
MT-175	22	870	NA	NA
MT-175	22	870	NA	NA
MT-175	22	870	NA	NA
MT-175	44	1740	55	1
MT-175	44	1740	60	1
MT-175	44	1740	25	1
MT-175	44	1740	NA	NA
MT-175	44	1740	NA	NA
MT-175	44	1740	NA	NA
MT-175	44	1740	NA	NA
MT-175	44	1740	NA	NA
MT-175	44	1740	NA	NA
MT-175	44	1740	NA	NA
MT-175	88	3480	100	0
MT-175	88	3480	100	0
MT-175	88	3480	100	0
MT-175	88	3480	100	0
MT-175	88	3480	100	0
MT-175	88	3480	100	0
MT-175	88	3480	100	0
MT-175	88	3480	100	0
MT-175	88	3480	100	0
MT-175	88	3480	100	0
MT-175	132	5221	100	0
MT-175	132	5221	100	0
MT-175	132	5221	100	0
MT-175	132	5221	100	0
MT-175	132	5221	100	0
MT-175	132	5221	100	0
MT-175	132	5221	100	0
MT-175	132	5221	100	0
MT-175	132	5221	100	0
MT-175	132	5221	100	0
MT-175	176	6961	100	0
MT-175	176	6961	100	0
MT-175	176	6961	100	0
MT-175	176	6961	100	0
MT-175	176	6961	100	0
MT-175	176	6961	100	0
MT-175	176	6961	100	0
MT-175	176	6961	100	0
MT-175	176	6961	100	0
MT-175	176	6961	100	0
MT-175	220	8701	100	0
MT-175	220	8701	100	0
MT-175	220	8701	100	0
MT-175	220	8701	100	0
MT-175	220	8701	100	0
MT-175	220	8701	100	0
MT-175	220	8701	100	0
MT-175	220	8701	100	0
MT-175	220	8701	100	0
MT-175	220	8701	100	0
MT-175	264	10441	100	0
MT-175	264	10441	100	0
MT-175	264	10441	100	0
MT-175	264	10441	100	0
MT-175	264	10441	100	0
MT-175	264	10441	100	0
MT-175	264	10441	100	0
MT-175	264	10441	100	0
MT-175	264	10441	100	0
MT-175	264	10441	100	0
MT-149	0	0	0	1
MT-149	0	0	0	1
MT-149	0	0	0	1
MT-149	0	0	0	1
MT-149	0	0	0	1
MT-149	0	0	0	1
MT-149	0	0	0	1
MT-149	0	0	0	1
MT-149	0	0	0	1
MT-149	0	0	0	1
MT-149	2.75	109	0	1
MT-149	2.75	109	0	1
MT-149	2.75	109	0	1
MT-149	2.75	109	0	1
MT-149	2.75	109	0	1
MT-149	2.75	109	0	1
MT-149	2.75	109	0	1
MT-149	2.75	109	0	1
MT-149	2.75	109	NA	NA
MT-149	2.75	109	NA	NA
MT-149	5.5	218	0	1
MT-149	5.5	218	0	1
MT-149	5.5	218	5	1
MT-149	5.5	218	10	1
MT-149	5.5	218	0	1
MT-149	5.5	218	0	1
MT-149	5.5	218	0	1
MT-149	5.5	218	0	1
MT-149	5.5	218	NA	NA
MT-149	5.5	218	NA	NA
MT-149	11	435	20	1
MT-149	11	435	15	1
MT-149	11	435	NA	NA
MT-149	11	435	20	1
MT-149	11	435	25	1
MT-149	11	435	20	1
MT-149	11	435	20	1
MT-149	11	435	35	1
MT-149	11	435	NA	NA
MT-149	11	435	NA	NA
MT-149	22	870	95	0
MT-149	22	870	80	1
MT-149	22	870	98	0
MT-149	22	870	NA	NA
MT-149	22	870	90	1
MT-149	22	870	100	0
MT-149	22	870	70	1
MT-149	22	870	85	1
MT-149	22	870	95	0
MT-149	22	870	NA	NA
MT-149	44	1740	100	0
MT-149	44	1740	100	0
MT-149	44	1740	100	0
MT-149	44	1740	100	0
MT-149	44	1740	100	0
MT-149	44	1740	100	0
MT-149	44	1740	100	0
MT-149	44	1740	98	0
MT-149	44	1740	100	0
MT-149	44	1740	NA	NA
MT-149	88	3480	NA	NA
MT-149	88	3480	100	0
MT-149	88	3480	100	0
MT-149	88	3480	100	0
MT-149	88	3480	100	0
MT-149	88	3480	100	0
MT-149	88	3480	100	0
MT-149	88	3480	100	0
MT-149	88	3480	100	0
MT-149	88	3480	100	0
MT-149	132	5221	100	0
MT-149	132	5221	100	0
MT-149	132	5221	100	0
MT-149	132	5221	100	0
MT-149	132	5221	100	0
MT-149	132	5221	100	0
MT-149	132	5221	100	0
MT-149	132	5221	100	0
MT-149	132	5221	100	0
MT-149	132	5221	100	0
MT-149	176	6961	100	0
MT-149	176	6961	100	0
MT-149	176	6961	100	0
MT-149	176	6961	100	0
MT-149	176	6961	100	0
MT-149	176	6961	100	0
MT-149	176	6961	100	0
MT-149	176	6961	100	0
MT-149	176	6961	100	0
MT-149	176	6961	100	0
MT-149	220	8701	100	0
MT-149	220	8701	100	0
MT-149	220	8701	100	0
MT-149	220	8701	100	0
MT-149	220	8701	100	0
MT-149	220	8701	100	0
MT-149	220	8701	100	0
MT-149	220	8701	100	0
MT-149	220	8701	100	0
MT-149	220	8701	100	0
MT-149	264	10441	100	0
MT-149	264	10441	100	0
MT-149	264	10441	100	0
MT-149	264	10441	100	0
MT-149	264	10441	100	0
MT-149	264	10441	100	0
MT-149	264	10441	100	0
MT-149	264	10441	100	0
MT-149	264	10441	100	0
MT-149	264	10441	100	0
MT-110	0	0	0	1
MT-110	0	0	0	1
MT-110	0	0	0	1
MT-110	0	0	0	1
MT-110	0	0	0	1
MT-110	0	0	0	1
MT-110	0	0	0	1
MT-110	0	0	0	1
MT-110	0	0	0	1
MT-110	0	0	0	1
MT-110	2.75	109	0	1
MT-110	2.75	109	0	1
MT-110	2.75	109	0	1
MT-110	2.75	109	0	1
MT-110	2.75	109	0	1
MT-110	2.75	109	0	1
MT-110	2.75	109	0	1
MT-110	2.75	109	0	1
MT-110	2.75	109	0	1
MT-110	2.75	109	0	1
MT-110	5.5	218	0	1
MT-110	5.5	218	0	1
MT-110	5.5	218	0	1
MT-110	5.5	218	0	1
MT-110	5.5	218	0	1
MT-110	5.5	218	0	1
MT-110	5.5	218	0	1
MT-110	5.5	218	0	1
MT-110	5.5	218	0	1
MT-110	5.5	218	0	1
MT-110	11	435	0	1
MT-110	11	435	0	1
MT-110	11	435	0	1
MT-110	11	435	0	1
MT-110	11	435	0	1
MT-110	11	435	0	1
MT-110	11	435	0	1
MT-110	11	435	0	1
MT-110	11	435	0	1
MT-110	11	435	0	1
MT-110	22	870	0	1
MT-110	22	870	0	1
MT-110	22	870	0	1
MT-110	22	870	0	1
MT-110	22	870	0	1
MT-110	22	870	0	1
MT-110	22	870	0	1
MT-110	22	870	0	1
MT-110	22	870	0	1
MT-110	22	870	0	1
MT-110	44	1740	30	1
MT-110	44	1740	35	1
MT-110	44	1740	30	1
MT-110	44	1740	40	1
MT-110	44	1740	35	1
MT-110	44	1740	NA	NA
MT-110	44	1740	NA	NA
MT-110	44	1740	NA	NA
MT-110	44	1740	NA	NA
MT-110	44	1740	NA	NA
MT-110	88	3480	55	1
MT-110	88	3480	50	1
MT-110	88	3480	40	1
MT-110	88	3480	55	1
MT-110	88	3480	NA	NA
MT-110	88	3480	NA	NA
MT-110	88	3480	NA	NA
MT-110	88	3480	NA	NA
MT-110	88	3480	NA	NA
MT-110	88	3480	NA	NA
MT-110	132	5221	100	0
MT-110	132	5221	100	0
MT-110	132	5221	100	0
MT-110	132	5221	100	0
MT-110	132	5221	100	0
MT-110	132	5221	100	0
MT-110	132	5221	100	0
MT-110	132	5221	100	0
MT-110	132	5221	100	0
MT-110	132	5221	100	0
MT-110	176	6961	100	0
MT-110	176	6961	100	0
MT-110	176	6961	100	0
MT-110	176	6961	100	0
MT-110	176	6961	100	0
MT-110	176	6961	100	0
MT-110	176	6961	100	0
MT-110	176	6961	100	0
MT-110	176	6961	100	0
MT-110	176	6961	100	0
MT-110	220	8701	100	0
MT-110	220	8701	100	0
MT-110	220	8701	100	0
MT-110	220	8701	100	0
MT-110	220	8701	100	0
MT-110	220	8701	100	0
MT-110	220	8701	100	0
MT-110	220	8701	100	0
MT-110	220	8701	100	0
MT-110	220	8701	100	0
MT-110	264	10441	100	0
MT-110	264	10441	100	0
MT-110	264	10441	100	0
MT-110	264	10441	100	0
MT-110	264	10441	100	0
MT-110	264	10441	100	0
MT-110	264	10441	100	0
MT-110	264	10441	100	0
MT-110	264	10441	100	0
MT-110	264	10441	100	0
